# Supplementary material for: Strategic design of thiophene-fused nickel dithiolene derivatives for efficient NLO response
Source: Royal Society of Chemistry journal article supplement (doi:10.1039/c8cp01592a), 2018-01-01
Supplement: c8cp01592a1.pdf [file c8cp01592a1.pdf]

## Strategic Design of Thiophene-Fused Nickel Dithiolene Derivatives for Efficient NLO Response

Manoj Majumder and Anirban Misra\*

Department of Chemistry, University of North Bengal, Darjeeling, 734013, West Bengal,  
India

\*Phone: +919434228745; Email: anirbanmisra@yahoo.com

### Electronic Supplementary Information

X, Y, Z cartesian co-ordinate of the Optimized geometry of our studied systems.

1. Optimized minimum energy geometry of Th-NiTDT (1a)

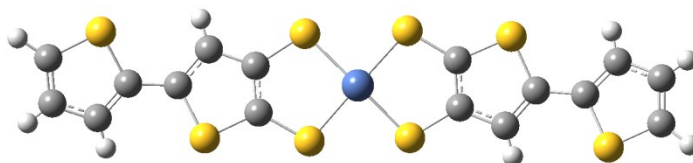

Figure S1. Thieryl expanded NiTDT (1a)

| Atom | Bohr        |             |             |
|------|-------------|-------------|-------------|
|      | X           | Y           | Z           |
| Ni   | 0.00330600  | 0.07497000  | -0.27086700 |
| S    | 7.49106600  | -1.48475600 | 0.37759800  |
| S    | 4.47937600  | 1.67644700  | 0.01008800  |
| S    | 1.40341600  | 1.73206000  | -0.12581500 |
| S    | 1.58628800  | -1.39820600 | -0.44762900 |
| S    | -1.61464900 | 1.53557900  | -0.28137200 |

|   |              |             |             |
|---|--------------|-------------|-------------|
| S | -1.34508500  | -1.62557500 | -0.07145200 |
| S | -4.41859100  | -1.66318800 | 0.11898000  |
| S | -7.58727400  | 1.33222800  | 0.44101600  |
| C | 9.02163200   | -0.72910700 | 0.53678300  |
| C | 6.72571600   | 0.04909000  | 0.13019600  |
| C | 5.26642200   | 0.11910900  | -0.05122700 |
| C | 2.90996000   | 0.92773800  | -0.16957800 |
| C | 3.03316500   | -0.45636600 | -0.29814200 |
| C | 4.39325700   | -0.94168300 | -0.23276300 |
| H | 4.64576200   | -1.83395500 | -0.30412700 |
| C | -3.02340600  | 0.53052700  | -0.11406400 |
| C | -2.87127800  | -0.84488800 | -0.00130300 |
| C | -5.27239200  | -0.13559400 | 0.01639300  |
| C | -6.73926700  | -0.14543700 | 0.10274100  |
| C | -9.10213200  | 0.50038600  | 0.42557400  |
| C | -8.94231600  | -0.81506700 | 0.17168000  |
| H | -9.64971400  | -1.41676700 | 0.11589400  |
| C | -7.60004000  | -1.18509700 | -0.00330300 |
| H | -7.33021900  | -2.05818500 | -0.17200200 |
| C | -4.41396600  | 0.96048200  | -0.10066100 |
| H | -4.69299700  | 1.84687000  | -0.16206700 |
| C | 7.64586700   | 1.04710400  | 0.17228800  |
| H | 7.42821000   | 1.94404000  | 0.05779700  |
| C | 8.97037300   | 0.59925000  | 0.40696400  |
| H | 9.70995700   | 1.15864300  | 0.46318800  |
| H | -10.01972000 | 1.04731000  | 0.58228400  |
| H | 9.89381600   | -1.34321400 | 0.71121800  |

2. Optimized minimum energy geometry of nTh-NiTDT (1b)

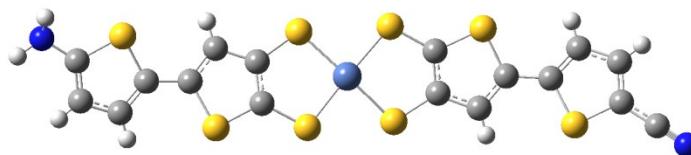

Figure S2. Neutral substituted thienyl expanded NiTDT (1b)

| Atom | Bohr        |             |             |
|------|-------------|-------------|-------------|
|      | X           | Y           | Z           |
| Ni   | -0.16608700 | 0.12181700  | -0.32380300 |
| S    | 7.37974300  | -1.16013200 | 0.24676900  |
| S    | 4.24525400  | 1.88878200  | -0.02317400 |
| S    | 1.16870600  | 1.82824000  | -0.14272500 |
| S    | 1.47191400  | -1.28330700 | -0.54574200 |
| S    | -1.84032800 | 1.51768900  | -0.28795800 |
| S    | -1.44640400 | -1.63426600 | -0.16168300 |
| S    | -4.51502500 | -1.79711700 | 0.04398100  |
| S    | -7.79514200 | 1.06281900  | 0.45909500  |
| C    | 8.88073900  | -0.35025800 | 0.41817400  |
| C    | 6.55428300  | 0.34841000  | 0.04284200  |
| C    | 5.09231400  | 0.36592900  | -0.12894700 |
| C    | 2.70539700  | 1.08469000  | -0.21522600 |
| C    | 2.88148500  | -0.28991500 | -0.37971000 |
| C    | 4.25966600  | -0.72331100 | -0.33377200 |
| H    | 4.54668700  | -1.60272800 | -0.42928400 |
| C    | -3.20767200 | 0.45505000  | -0.13957200 |
| C    | -3.00149600 | -0.91623400 | -0.06304500 |
| C    | -5.42798200 | -0.30218300 | -0.01553400 |
| C    | -6.89325400 | -0.37091200 | 0.07847700  |

|   |              |             |             |
|---|--------------|-------------|-------------|
| C | -9.27652400  | 0.17324400  | 0.42979400  |
| C | -9.06755500  | -1.12764300 | 0.14051600  |
| H | -9.75172100  | -1.75490700 | 0.07313000  |
| C | -7.71295500  | -1.44025600 | -0.05040400 |
| H | -7.41026800  | -2.29759700 | -0.24352700 |
| C | -4.61387300  | 0.82957200  | -0.10856900 |
| H | -4.92712700  | 1.70527600  | -0.14484600 |
| C | 7.43485100   | 1.37978800  | 0.10619400  |
| H | 7.18221900   | 2.27082000  | 0.01638300  |
| C | 8.77705100   | 0.97846300  | 0.32324000  |
| H | 9.49475500   | 1.56489500  | 0.38982700  |
| N | -10.49898200 | 0.85050100  | 0.59082800  |
| H | -10.51665200 | 1.49321900  | 1.37321400  |
| H | -11.28645200 | 0.21761600  | 0.64671600  |
| C | 10.07353000  | -1.08462900 | 0.61837700  |
| N | 11.05205000  | -1.68330800 | 0.78500800  |

3. Optimized minimum energy geometry of zTh-NiTDT (1c)

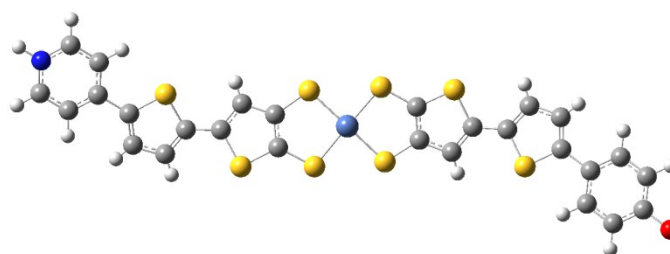

Figure S3. Ionic substituted thienyl expanded NiTDT (1c)

| Atom | Bohr       |             |             |
|------|------------|-------------|-------------|
|      | X          | Y           | Z           |
| Ni   | 0.00330600 | 0.07497000  | -0.27086700 |
| S    | 7.49106600 | -1.48475600 | 0.37759800  |

|   |             |             |             |
|---|-------------|-------------|-------------|
| S | 4.47937600  | 1.67644700  | 0.01008800  |
| S | 1.40341600  | 1.73206000  | -0.12581500 |
| S | 1.58628800  | -1.39820600 | -0.44762900 |
| S | -1.61464900 | 1.53557900  | -0.28137200 |
| S | -1.34508500 | -1.62557500 | -0.07145200 |
| S | -4.41859100 | -1.66318800 | 0.11898000  |
| S | -7.58727400 | 1.33222800  | 0.44101600  |
| C | 9.02163200  | -0.72910700 | 0.53678300  |
| C | 6.72571600  | 0.04909000  | 0.13019600  |
| C | 5.26642200  | 0.11910900  | -0.05122700 |
| C | 2.90996000  | 0.92773800  | -0.16957800 |
| C | 3.03316500  | -0.45636600 | -0.29814200 |
| C | 4.39325700  | -0.94168300 | -0.23276300 |
| H | 4.64576200  | -1.83395500 | -0.30412700 |
| C | -3.02340600 | 0.53052700  | -0.11406400 |
| C | -2.87127800 | -0.84488800 | -0.00130300 |
| C | -5.27239200 | -0.13559400 | 0.01639300  |
| C | -6.73926700 | -0.14543700 | 0.10274100  |
| C | -9.10213200 | 0.50038600  | 0.42557400  |
| C | -8.94231600 | -0.81506700 | 0.17168000  |
| H | -9.64971400 | -1.41676700 | 0.11589400  |
| C | -7.60004000 | -1.18509700 | -0.00330300 |
| H | -7.33021900 | -2.05818500 | -0.17200200 |
| C | -4.41396600 | 0.96048200  | -0.10066100 |
| H | -4.69299700 | 1.84687000  | -0.16206700 |
| C | 7.64586700  | 1.04710400  | 0.17228800  |
| H | 7.42821000  | 1.94404000  | 0.05779700  |
| C | 8.97037300  | 0.59925000  | 0.40696400  |
| H | 9.70995700  | 1.15864300  | 0.46318800  |
| C | 10.26431140 | -1.60408077 | 0.78531632  |
| C | 10.13185931 | -2.98855737 | 0.89555425  |

|   |              |             |            |
|---|--------------|-------------|------------|
| C | 11.52225936  | -1.01252460 | 0.90010474 |
| C | 11.25706491  | -3.78115864 | 1.12120289 |
| H | 9.13987580   | -3.45455160 | 0.80577735 |
| C | 12.64804085  | -1.80531720 | 1.12483973 |
| H | 11.62685686  | 0.07862756  | 0.81306824 |
| C | 12.51563353  | -3.18942410 | 1.23553490 |
| H | 11.15265901  | -4.87236661 | 1.20873055 |
| H | 13.63980543  | -1.33866132 | 1.21489259 |
| C | -10.41096447 | 1.28050942  | 0.64910257 |
| C | -10.37107082 | 2.65208412  | 0.90141738 |
| C | -11.63629058 | 0.61595325  | 0.59921125 |
| C | -11.55624510 | 3.35873850  | 1.10445248 |
| H | -9.40484190  | 3.17557325  | 0.94144968 |
| C | -12.82197628 | 1.32285899  | 0.80130918 |
| H | -11.66792631 | -0.46502587 | 0.40018276 |
| H | -11.52484264 | 4.43971414  | 1.30395703 |
| H | -13.78796975 | 0.79869624  | 0.76150635 |
| H | -13.71648123 | 3.25141127  | 1.21409761 |
| N | -12.78214157 | 2.69401840  | 1.05403848 |
| O | 13.66913133  | -4.00235199 | 1.4668163  |

4. Optimized minimum energy geometry of Ph-NiTDT (2a)

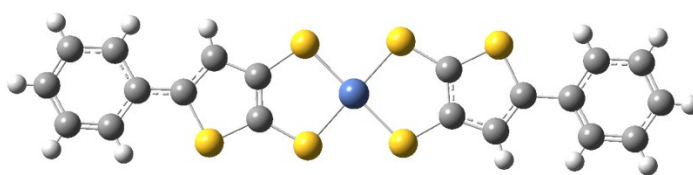

Figure S4. Phenyl expanded NiTDT (2a)

| Atom | Bohr       |            |            |
|------|------------|------------|------------|
|      | X          | Y          | Z          |
| Ni   | 1.02100000 | 5.44800000 | 4.03400000 |
| S    | 0.15200000 | 6.38900000 | 5.77900000 |

|   |             |            |             |
|---|-------------|------------|-------------|
| S | 2.77400000  | 6.68100000 | 4.39800000  |
| S | -3.38200000 | 4.11500000 | 5.15800000  |
| S | -0.71700000 | 4.24100000 | 3.65400000  |
| S | 1.90900000  | 4.48700000 | 2.29600000  |
| S | 5.43100000  | 6.76700000 | 2.90100000  |
| C | 6.92400000  | 5.78100000 | 0.74100000  |
| C | 7.93500000  | 6.65300000 | 1.12600000  |
| H | 7.80400000  | 7.21300000 | 1.85800000  |
| C | 9.15000000  | 6.70200000 | 0.42400000  |
| H | 9.83100000  | 7.27600000 | 0.69300000  |
| C | 9.31000000  | 5.87800000 | -0.66800000 |
| H | 10.08500000 | 5.92100000 | -1.18100000 |
| C | 8.29800000  | 4.98000000 | -0.99200000 |
| H | 8.42400000  | 4.39100000 | -1.70000000 |
| C | 7.12800000  | 4.94600000 | -0.29500000 |
| H | 6.46500000  | 4.34100000 | -0.53800000 |
| C | -4.84200000 | 5.05900000 | 7.30700000  |
| C | -5.85000000 | 4.11800000 | 7.01700000  |
| H | -5.73800000 | 3.55000000 | 6.28900000  |
| C | -6.96400000 | 4.00900000 | 7.75200000  |
| H | -7.60400000 | 3.37600000 | 7.52300000  |
| C | -7.17800000 | 4.82300000 | 8.84700000  |
| H | -7.96100000 | 4.74100000 | 9.34300000  |
| C | -6.25100000 | 5.73400000 | 9.19300000  |
| H | -6.39100000 | 6.27300000 | 9.93700000  |
| C | -5.08300000 | 5.87800000 | 8.44900000  |
| H | -4.45400000 | 6.51400000 | 8.69900000  |
| C | 3.83200000  | 6.16200000 | 3.12700000  |
| C | 3.49500000  | 5.16500000 | 2.14200000  |
| C | 4.54300000  | 4.93000000 | 1.18400000  |
| H | 4.50700000  | 4.32700000 | 0.47700000  |

|   |             |            |            |
|---|-------------|------------|------------|
| C | 5.61800000  | 5.76000000 | 1.49600000 |
| C | -2.45300000 | 5.93300000 | 6.82200000 |
| H | -2.35300000 | 6.54200000 | 7.51800000 |
| C | -3.61600000 | 5.15400000 | 6.56700000 |
| C | -1.42900000 | 5.61600000 | 5.80900000 |
| C | -1.78400000 | 4.71300000 | 4.91000000 |

5. Optimized minimum energy geometry of nPh-NiTDT (2b)

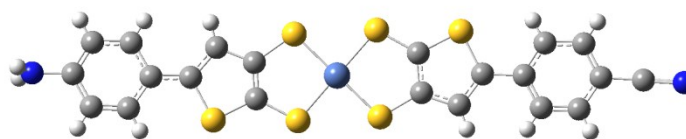

Figure S5. Neutral substituted Phenyl expanded NiTDT (1b)

| Atom | X           | Bohr<br>Y  | Z           |
|------|-------------|------------|-------------|
| Ni   | -0.48339625 | 5.90987938 | -1.47930245 |
| S    | -2.06614785 | 6.90572311 | -0.38895405 |
| S    | 0.90484888  | 7.07261223 | -0.27654654 |
| S    | -4.91218570 | 4.77443947 | -2.71351243 |
| S    | -1.84959365 | 4.77231780 | -2.68816610 |
| S    | 1.11148722  | 4.89333925 | -2.55433821 |
| S    | 3.95535528  | 7.03093985 | -0.24956336 |
| C    | 6.28340403  | 5.95946604 | -1.38929048 |
| C    | 7.00352628  | 6.79274221 | -0.54205689 |
| H    | 6.54872982  | 7.36584601 | 0.03352735  |
| C    | 8.40756721  | 6.78315635 | -0.54473672 |
| H    | 8.88725964  | 7.33119259 | 0.03418422  |
| C    | 9.05583030  | 5.94107615 | -1.42091930 |
| C    | 8.30336321  | 5.08254587 | -2.21605642 |
| H    | 8.74066092  | 4.48094535 | -2.77364814 |



|   |              |            |             |
|---|--------------|------------|-------------|
| C | 6.94141082   | 5.10518363 | -2.19512274 |
| H | 6.46305824   | 4.52571478 | -2.74287967 |
| C | -7.20792795  | 5.80245244 | -1.56734757 |
| C | -7.97566647  | 4.90117429 | -2.33149433 |
| H | -7.53965145  | 4.32091563 | -2.91316673 |
| C | -9.31118573  | 4.84696809 | -2.25054986 |
| H | -9.77776405  | 4.23872136 | -2.77502158 |
| C | -10.00812637 | 5.68134510 | -1.39878361 |
| C | -9.33969040  | 6.55665647 | -0.62678014 |
| H | -9.80913671  | 7.10928930 | -0.04551073 |
| C | -7.95146053  | 6.64347565 | -0.68823139 |
| H | -7.50474661  | 7.25541278 | -0.15100089 |
| C | 2.43272151   | 6.49576832 | -0.85708277 |
| C | 2.59003546   | 5.50278775 | -1.89006143 |
| C | 3.96514873   | 5.21358464 | -2.20105666 |
| H | 4.26106770   | 4.60477046 | -2.83865470 |
| C | 4.77531605   | 6.00141494 | -1.38569090 |
| C | -4.86085770  | 6.57051032 | -0.78775129 |
| H | -5.09561979  | 7.18252484 | -0.12773463 |
| C | -5.77350696  | 5.83794094 | -1.59697836 |
| C | -3.48254784  | 6.19977256 | -1.15930132 |
| C | -3.37974854  | 5.30241409 | -2.12564239 |
| N | -11.47523762 | 5.61233392 | -1.33721873 |
| C | 10.59280332  | 5.94913299 | -1.51709113 |
| H | -12.02814262 | 6.14243984 | -1.98009024 |
| H | -11.92035174 | 5.03528235 | -0.65246701 |
| N | 12.05991393  | 5.95682361 | -1.60889152 |

6. Optimized minimum energy geometry of zPh-NiTDT (2c)

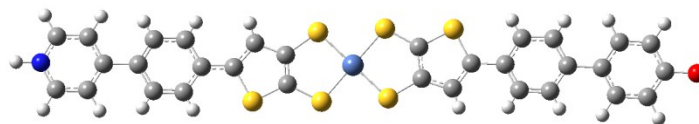

Figure S6. Ionic substituted Phenyl expanded NiTDT (2c)

| Atom | Bohr        |             |             |
|------|-------------|-------------|-------------|
|      | X           | Y           | Z           |
| Ni   | -0.27429200 | 0.03643100  | -0.07163100 |
| S    | -1.83914500 | 1.53204400  | -0.07823900 |
| S    | 1.13434700  | 1.69214400  | -0.08375200 |
| S    | -4.72247300 | -1.58696900 | -0.14181100 |
| S    | -1.66042800 | -1.60686300 | -0.08179200 |
| S    | 1.30231200  | -1.46222900 | -0.03928100 |
| S    | 4.18359200  | 1.64664100  | 0.00615500  |
| C    | 6.49227000  | 0.05435100  | 0.04445800  |
| C    | 7.22705600  | 1.23346800  | 0.02203800  |
| H    | 6.78250300  | 2.05069700  | -0.01101100 |
| C    | 8.63069500  | 1.20801400  | 0.04610900  |
| H    | 9.12002400  | 1.99931400  | 0.04624000  |
| C    | 9.26392100  | -0.01481300 | 0.07364000  |
| C    | 8.49632100  | -1.17263200 | 0.14960900  |
| H    | 8.92285700  | -1.99590700 | 0.21553600  |
| C    | 7.13499400  | -1.12543600 | 0.12900000  |
| H    | 6.64642600  | -1.91537100 | 0.17312400  |
| C    | -6.99963700 | -0.01997900 | -0.14349700 |
| C    | -7.78328800 | -1.18407100 | -0.01533600 |
| H    | -7.35764100 | -2.01040500 | 0.01854700  |

|   |             |             |             |
|---|-------------|-------------|-------------|
| C | -9.11959600 | -1.14565500 | 0.06153300  |
| H | -9.59691900 | -1.93830800 | 0.14274000  |
| C | -9.80162300 | 0.05464500  | 0.02233900  |
| C | -9.11772900 | 1.20798900  | -0.08280600 |
| H | -9.57730200 | 2.01560400  | -0.09720100 |
| C | -7.72813600 | 1.20542600  | -0.16953700 |
| H | -7.27061200 | 2.01016900  | -0.24501400 |
| C | 2.65173400  | 0.85578100  | -0.03690900 |
| C | 2.79141600  | -0.57868700 | -0.01246200 |
| C | 4.16117900  | -1.01994900 | 0.00562200  |
| H | 4.44625600  | -1.90497300 | 0.02039000  |
| C | 4.98518500  | 0.10379000  | -0.00406000 |
| C | -4.63932500 | 1.04554800  | -0.14242600 |
| H | -4.86320400 | 1.94841800  | -0.14343000 |
| C | -5.56480000 | -0.03480000 | -0.17036400 |
| C | -3.26781900 | 0.50437200  | -0.10592500 |
| C | -3.18093700 | -0.81550900 | -0.10674400 |
| C | 10.73507000 | -0.10123600 | 0.07061700  |
| C | 11.41088300 | -1.28911700 | -0.33782700 |
| C | 11.54778400 | 1.00114600  | 0.47021500  |
| C | 12.78620100 | -1.37784800 | -0.34911000 |
| H | 10.82670600 | -2.13671100 | -0.68260800 |
| C | 12.92384900 | 0.92876900  | 0.47203800  |
| H | 11.06981100 | 1.91307200  | 0.81495100  |
| C | 13.62057000 | -0.26964300 | 0.05946400  |
| H | 13.28969700 | -2.28151700 | -0.67682400 |
| H | 13.53176700 | 1.76795800  | 0.79417400  |

|   |              |             |             |
|---|--------------|-------------|-------------|
| C | -11.26319800 | 0.06391200  | 0.10547600  |
| C | -12.04900000 | 1.24303600  | -0.16049000 |
| C | -12.03297500 | -1.10178700 | 0.45991800  |
| C | -13.41130400 | 1.24893600  | -0.08246600 |
| H | -11.56457900 | 2.16483000  | -0.45880000 |
| C | -13.39509500 | -1.08310300 | 0.54221900  |
| H | -11.53445800 | -2.03309400 | 0.69848500  |
| H | -14.01359500 | 2.12279800  | -0.29252300 |
| H | -13.98403200 | -1.94688300 | 0.82059900  |
| H | -15.11029200 | 0.09832400  | 0.33159500  |
| N | -14.10616800 | 0.08941400  | 0.27216900  |
| O | 14.90758300  | -0.34497200 | 0.05562600  |

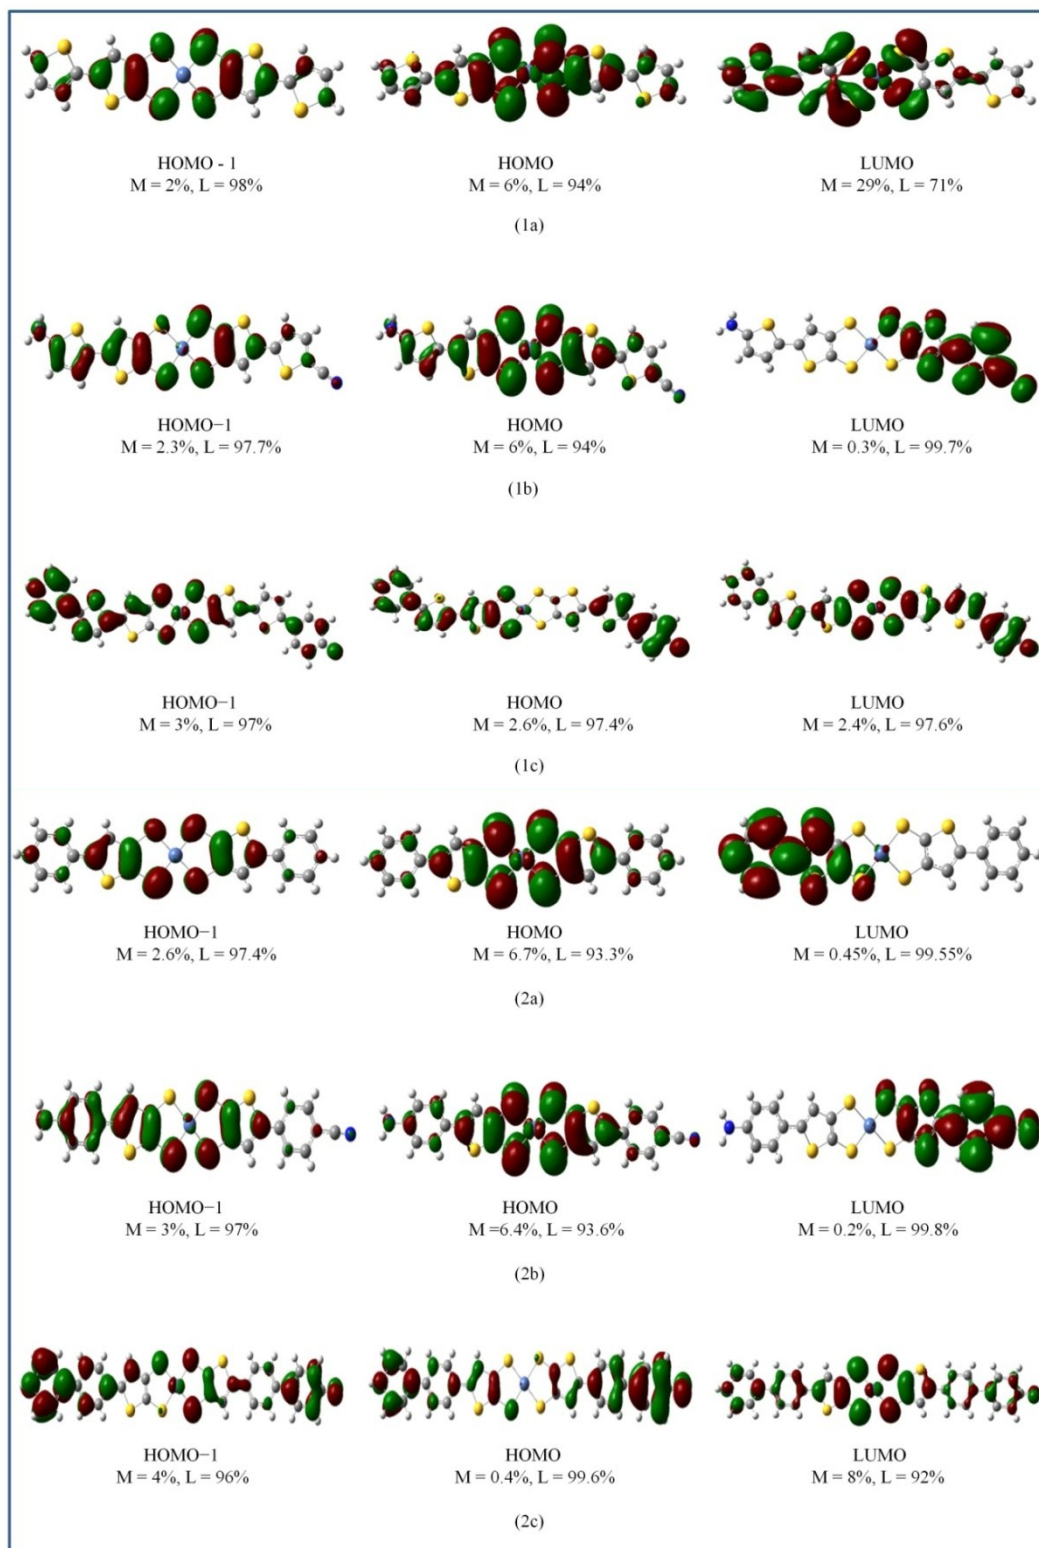

Figure S7. Electron density contours of the MOs of the systems under study.

Table S1: TDDFT calculated transitions for Thienyl (1a) and Phenyl (2a) expanded analogues of NiTDT core and its derivative (1b, 1c & 2b, 2c) at B3LYP and CAM-B3LYP/6-311g(d,p) level of theory.

| Model Compound | B3LYP/6-311G(d,p) |        | CAM-B3LYP/6-311G(d,p) |        |
|----------------|-------------------|--------|-----------------------|--------|
|                | Wavelength        | Osc    | Wavelength            | Osc    |
| 1a             | 978               | 0.2706 | 1173                  | 0.2274 |
| 1b             | 1008              | 0.2750 | 1229                  | 0.1749 |
| 1c             | 1818              | 0.5838 | 1371                  | 0.6975 |
| 2a             | 933               | 0.2947 | 1103                  | 0.2589 |
| 2b             | 925               | 0.4192 | 1057                  | 0.2089 |
| 2c             | 1224              | 0.5810 | 1414                  | 0.3635 |
